# Supplementary material
Source: Springer Nature journal article supplement (https://www.springermedizin.de/resource/supplementary/13063_2011_660_MOESM1_ESM.pdf/9618436)
Supplement: MOESM1 [file 9618436]

**Total Participants (N) = 448**

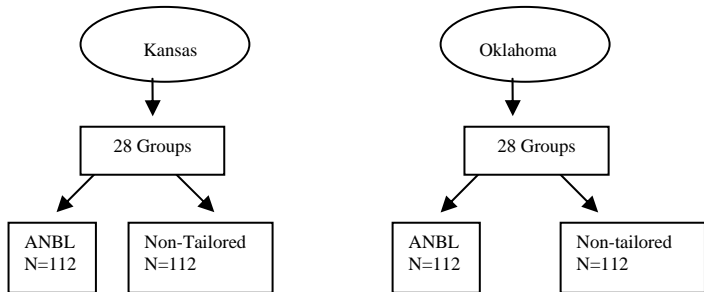

- All Participants will be offered free pharmacotherapy
- (Varenicline or Bupropion or NRT)
- Cluster or group size is 8 smokers per group.
- Each site (Kansas and Oklahoma) will randomize 28 groups, resulting in 14 groups per arm of the intervention, per site.
- Total sample size per site is 224 smokers
